# Supplementary material
Source: Springer Nature journal article supplement (https://www.springermedizin.de/resource/supplementary/12879_2007_598_MOESM2_ESM.pdf/9449448)

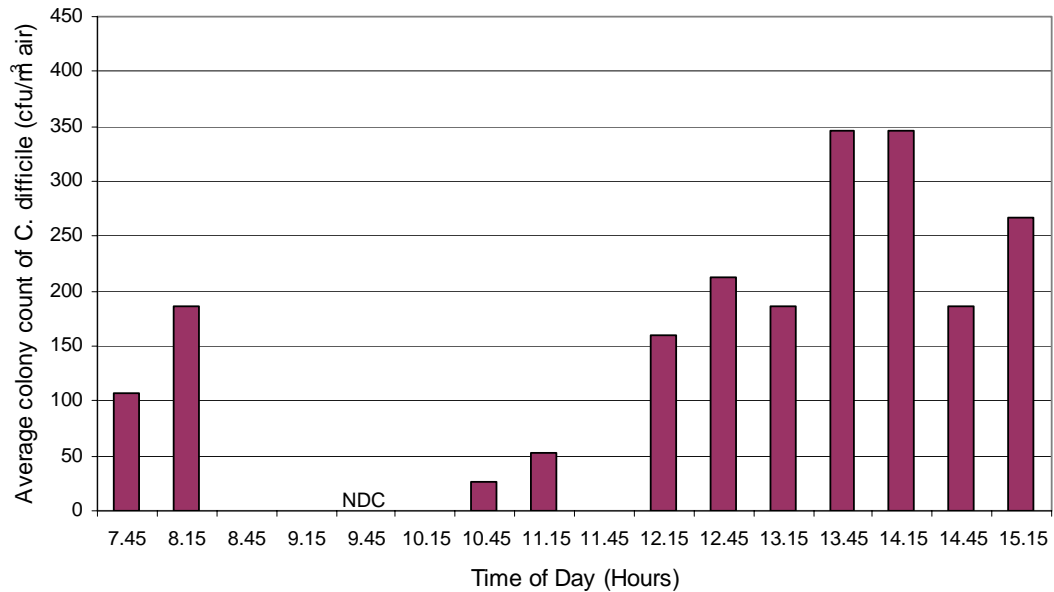

Supplement: MOESM2 [file 9449448]
